# Supplementary material
Source: publisher site journal article supplement (https://www.spandidos-publications.com/6780/downloadSupplementary)
Supplement: Supplementary file 1 [file downloadSupplementary]

Table SI. Echocardiographic results of the mice in each group at the end of the experiment.

| Echocardiographic result | Control     | DCM                      | DCM + Fer-1              | DCM + SS-31              |
|--------------------------|-------------|--------------------------|--------------------------|--------------------------|
| LVIDd, mm                | 3.53±0.40   | 4.14±0.36 <sup>a</sup>   | 3.96±0.30                | 3.91±0.15                |
| LVIDs, mm                | 2.39±0.31   | 3.51±0.34 <sup>b</sup>   | 3.12±0.32 <sup>a</sup>   | 2.91±0.21 <sup>c</sup>   |
| IVSd, mm                 | 0.74±0.11   | 1.27±0.12 <sup>b</sup>   | 1.06±0.14 <sup>a</sup>   | 0.99±0.16 <sup>c</sup>   |
| IVSs, mm                 | 0.95±0.14   | 1.56±0.11 <sup>b</sup>   | 1.27±0.17 <sup>a,c</sup> | 1.23±0.10 <sup>a,c</sup> |
| LVPWd, mm                | 0.80±0.06   | 1.38±0.11 <sup>b</sup>   | 1.21±0.13 <sup>b</sup>   | 1.14±0.11 <sup>b,c</sup> |
| LVPWs, mm                | 1.16±0.16   | 1.69±0.20 <sup>b</sup>   | 1.43±0.14                | 1.37±0.07 <sup>c</sup>   |
| LVEDV, $\mu$ l           | 52.69±14.05 | 76.72±15.18 <sup>a</sup> | 68.63±12.56              | 66.75±6.16               |
| LVESV, $\mu$ l           | 20.44±6.31  | 51.77±11.44 <sup>b</sup> | 38.94±9.74 <sup>a</sup>  | 32.64±5.74 <sup>c</sup>  |

<sup>a</sup>P<0.05, <sup>b</sup>P<0.01 vs. the control group; <sup>c</sup>P<0.05 vs. the DCM group. LVIDd, left ventricle internal diameter in diastole; LVIDs, left ventricle internal diameter in systole; IVSd, interventricular septum in diastole, IVSs, interventricular septum in systole; LVPWd, left ventricular posterior wall in diastole; LVPWs, left ventricular posterior wall in systole; LVEDV, left ventricular end-diastolic volume; LVESV, left ventricular end-systolic volume.
